# Supplementary material for: The Origin and Evolution of Six Miniature Inverted-Repeat Transposable Elements in Bombyx mori and Rhodnius prolixus
Source: PubMed Central journal article supplement — Genome Biol Evol. 2013 Oct 9;5(11):2020–31. doi: 10.1093/gbe/evt153 (PMC3845634; doi:10.1093/gbe/evt153), 2013-10-09
Supplement: supp_evt153_FigureS1.pdf [file supp_evt153_FigureS1.pdf]

A

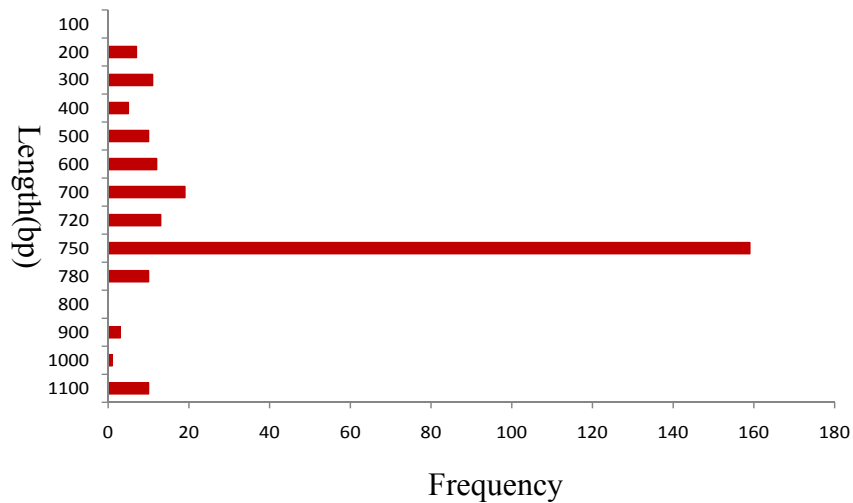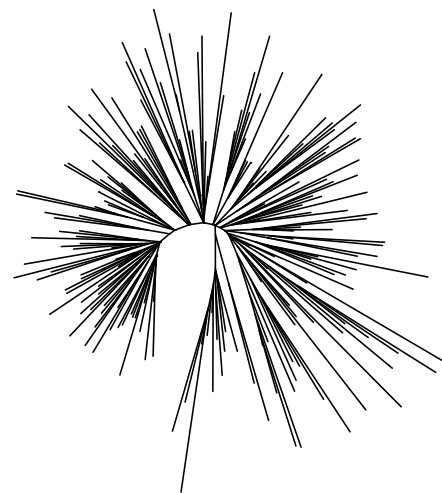

B

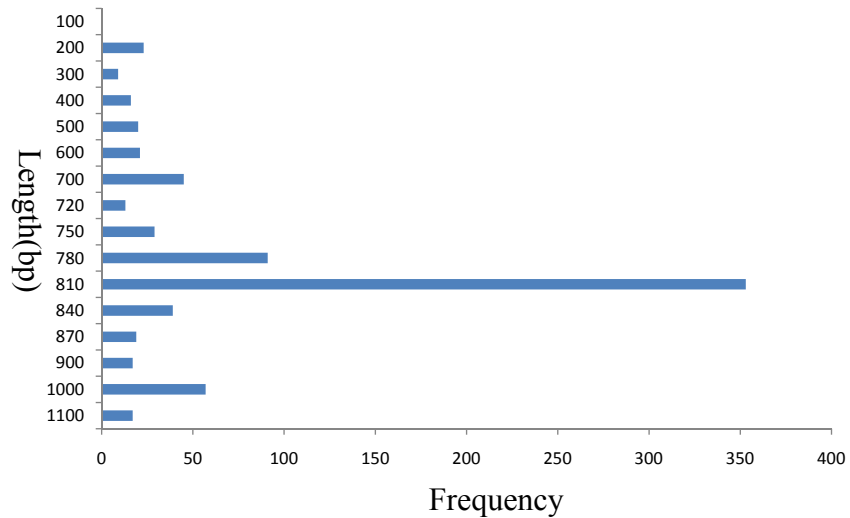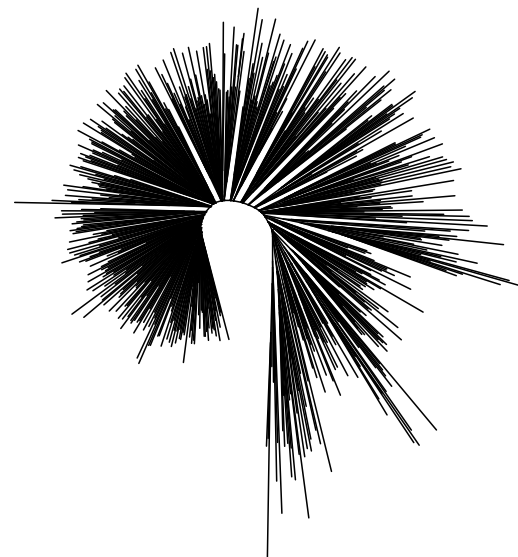

Fig.S1 Evidence for the burst transposition of *pogo\_NA\_RP* (A) and *Novel\_NA\_RP* (B): length distributions and phylogenetic trees.
