# Supplementary material for: The Origin and Evolution of Six Miniature Inverted-Repeat Transposable Elements in Bombyx mori and Rhodnius prolixus
Source: PubMed Central journal article supplement — Genome Biol Evol. 2013 Oct 9;5(11):2020–31. doi: 10.1093/gbe/evt153 (PMC3845634; doi:10.1093/gbe/evt153), 2013-10-09
Supplement: supp_evt153_FigureS2.pdf [file supp_evt153_FigureS2.pdf]

Fig.S2 The frequency distributions (ordinate) of sequence identities (abscissa) of MITEs in the silkworm and triatomine bug. The percentage identity is based on BLAST search, using the consensus from each species as the query. The sequences shorter than 100 bp were excluded. The blue or purple lines represent the tendency estimated by a simple moving average of the percentage identity scores. The name of each family is also shown.
