# Supplementary material for: The Origin and Evolution of Six Miniature Inverted-Repeat Transposable Elements in Bombyx mori and Rhodnius prolixus
Source: PubMed Central journal article supplement — Genome Biol Evol. 2013 Oct 9;5(11):2020–31. doi: 10.1093/gbe/evt153 (PMC3845634; doi:10.1093/gbe/evt153), 2013-10-09
Supplement: supp_evt153_FigureS3.pdf [file supp_evt153_FigureS3.pdf]

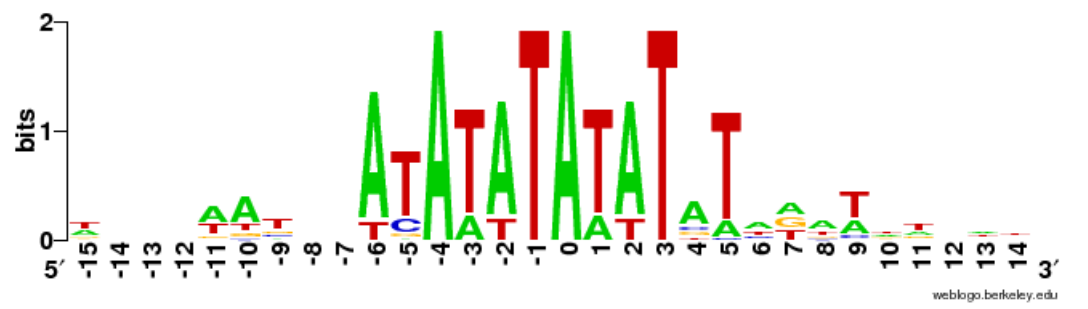

Sola1\_NA\_BM

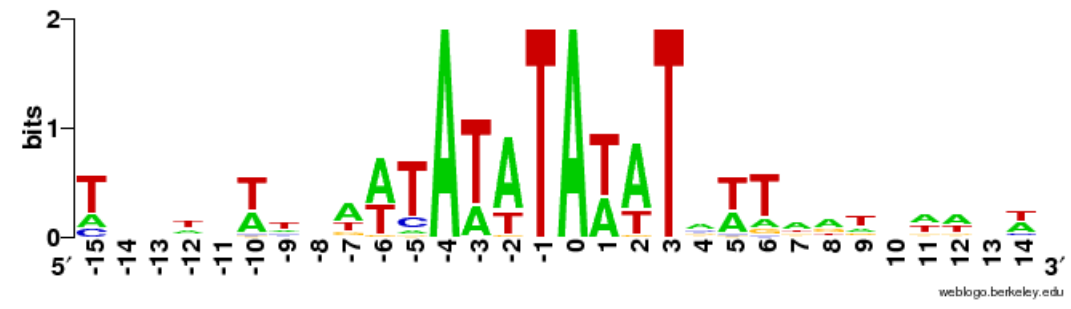

Sola1\_NA\_RP

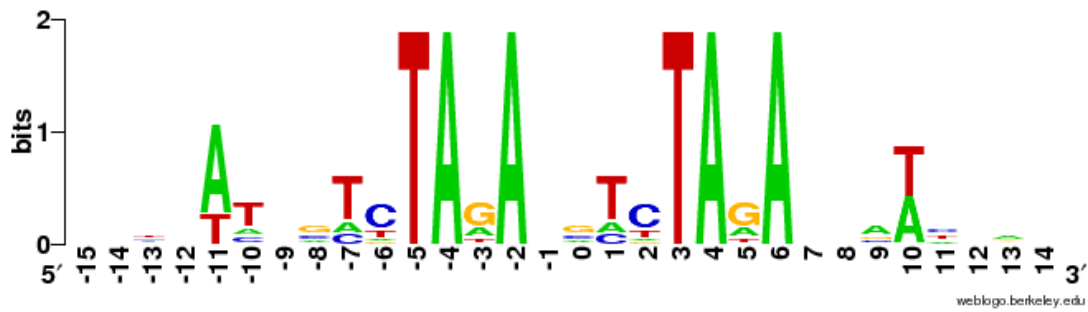

hAT1\_NA\_BM

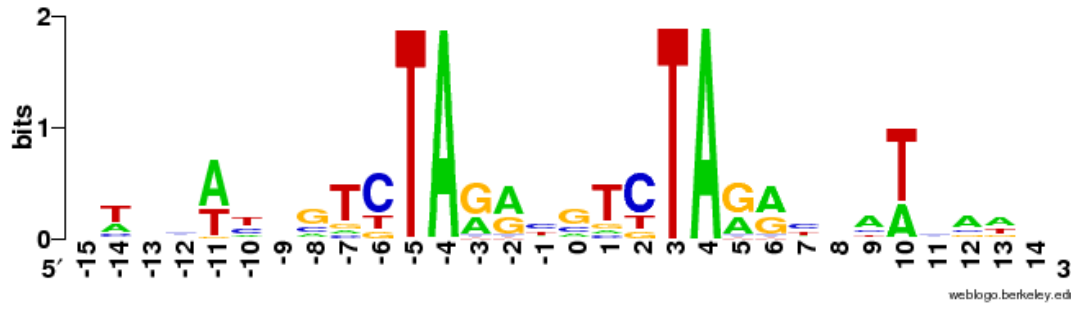

hAT1\_NA\_RP

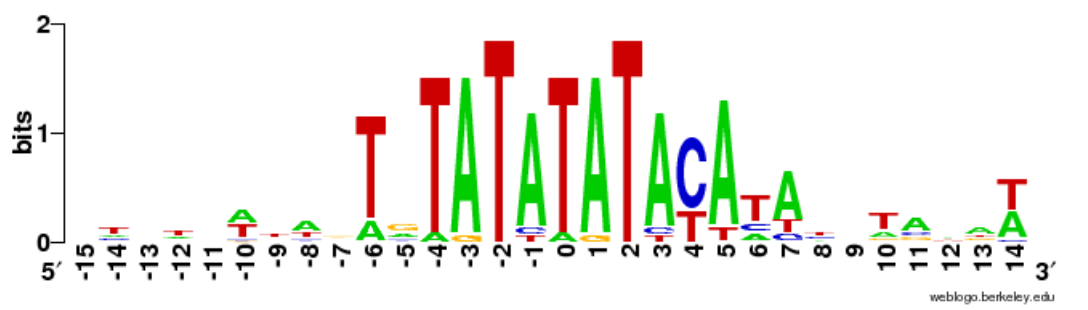

Ginger2\_NA\_BM

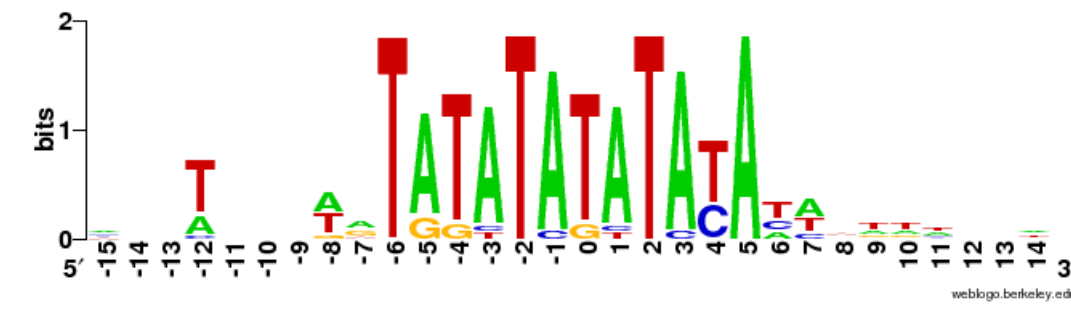

Ginger2\_NA\_RP

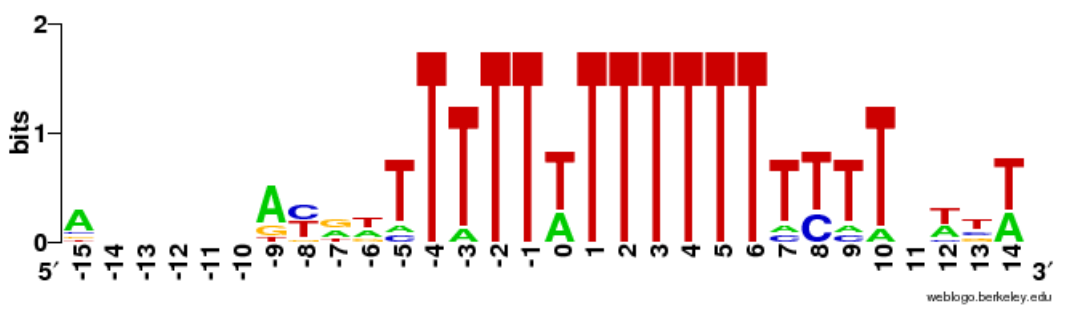

Novel\_NA\_BM

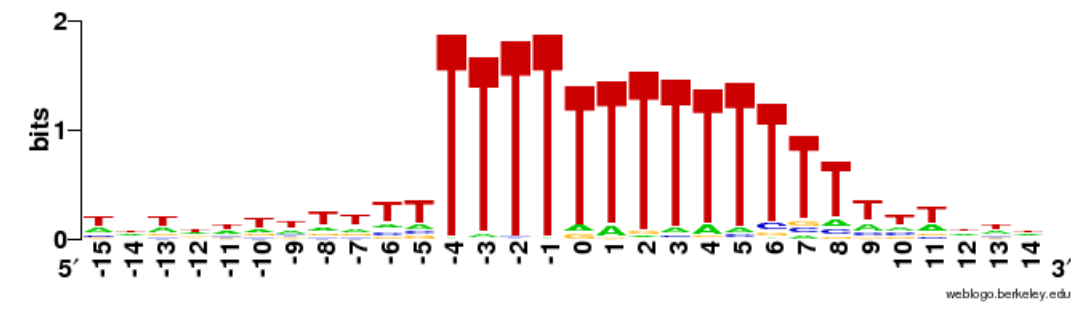

Novel\_NA\_RP

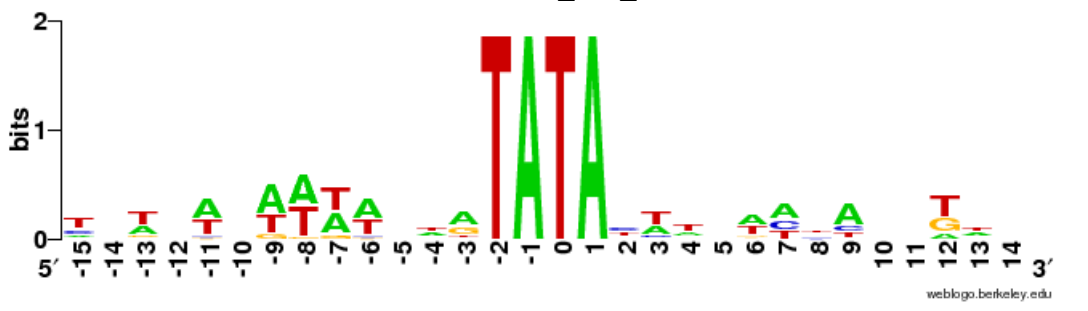

pogo\_NA\_BM

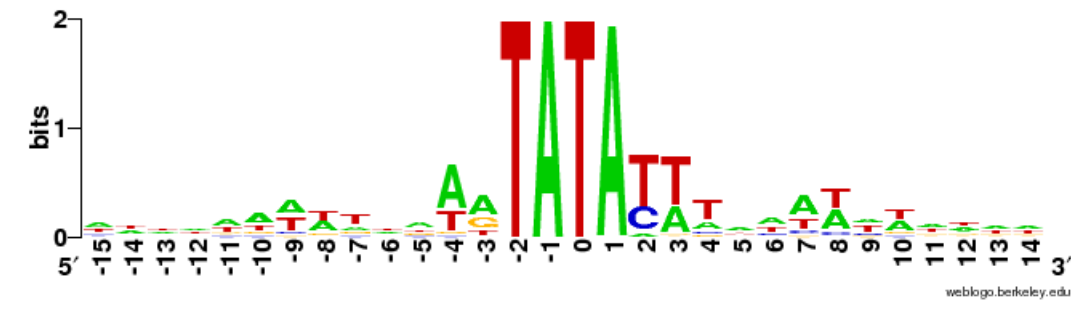

pogo\_NA\_RP

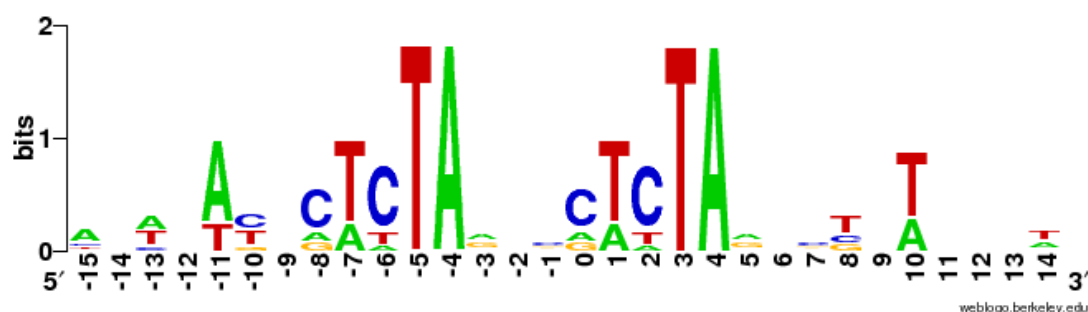

hAT2\_NA\_BM

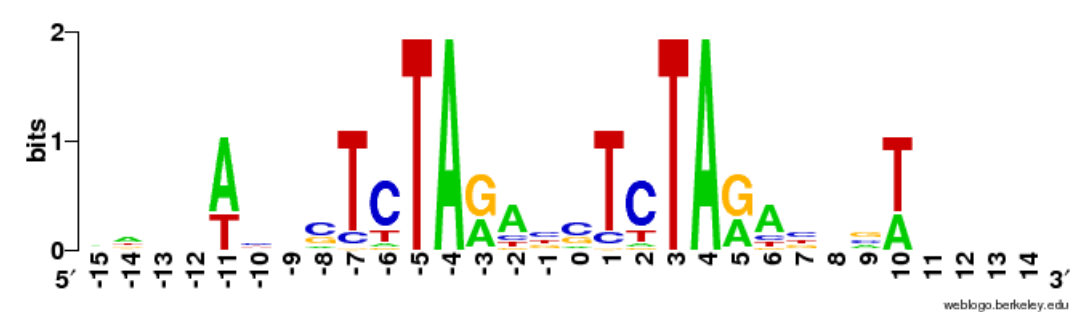

hAT2\_NA\_RP

Fig.S3 Sequence logo of the regions flanking MITEs insertions. The 15 nt upstream and downstream of all full-length copies of these families in the silkworm and triatomine bug are presented in each logo.

The vertical axis is a measure of sequence information, which has a maximum value of 2 and is proportional to the level of sequence conservation at each position.
