# Supplementary material for: The Origin and Evolution of Six Miniature Inverted-Repeat Transposable Elements in Bombyx mori and Rhodnius prolixus
Source: PubMed Central journal article supplement — Genome Biol Evol. 2013 Oct 9;5(11):2020–31. doi: 10.1093/gbe/evt153 (PMC3845634; doi:10.1093/gbe/evt153), 2013-10-09
Supplement: supp_evt153_FigureS4.pdf [file supp_evt153_FigureS4.pdf]

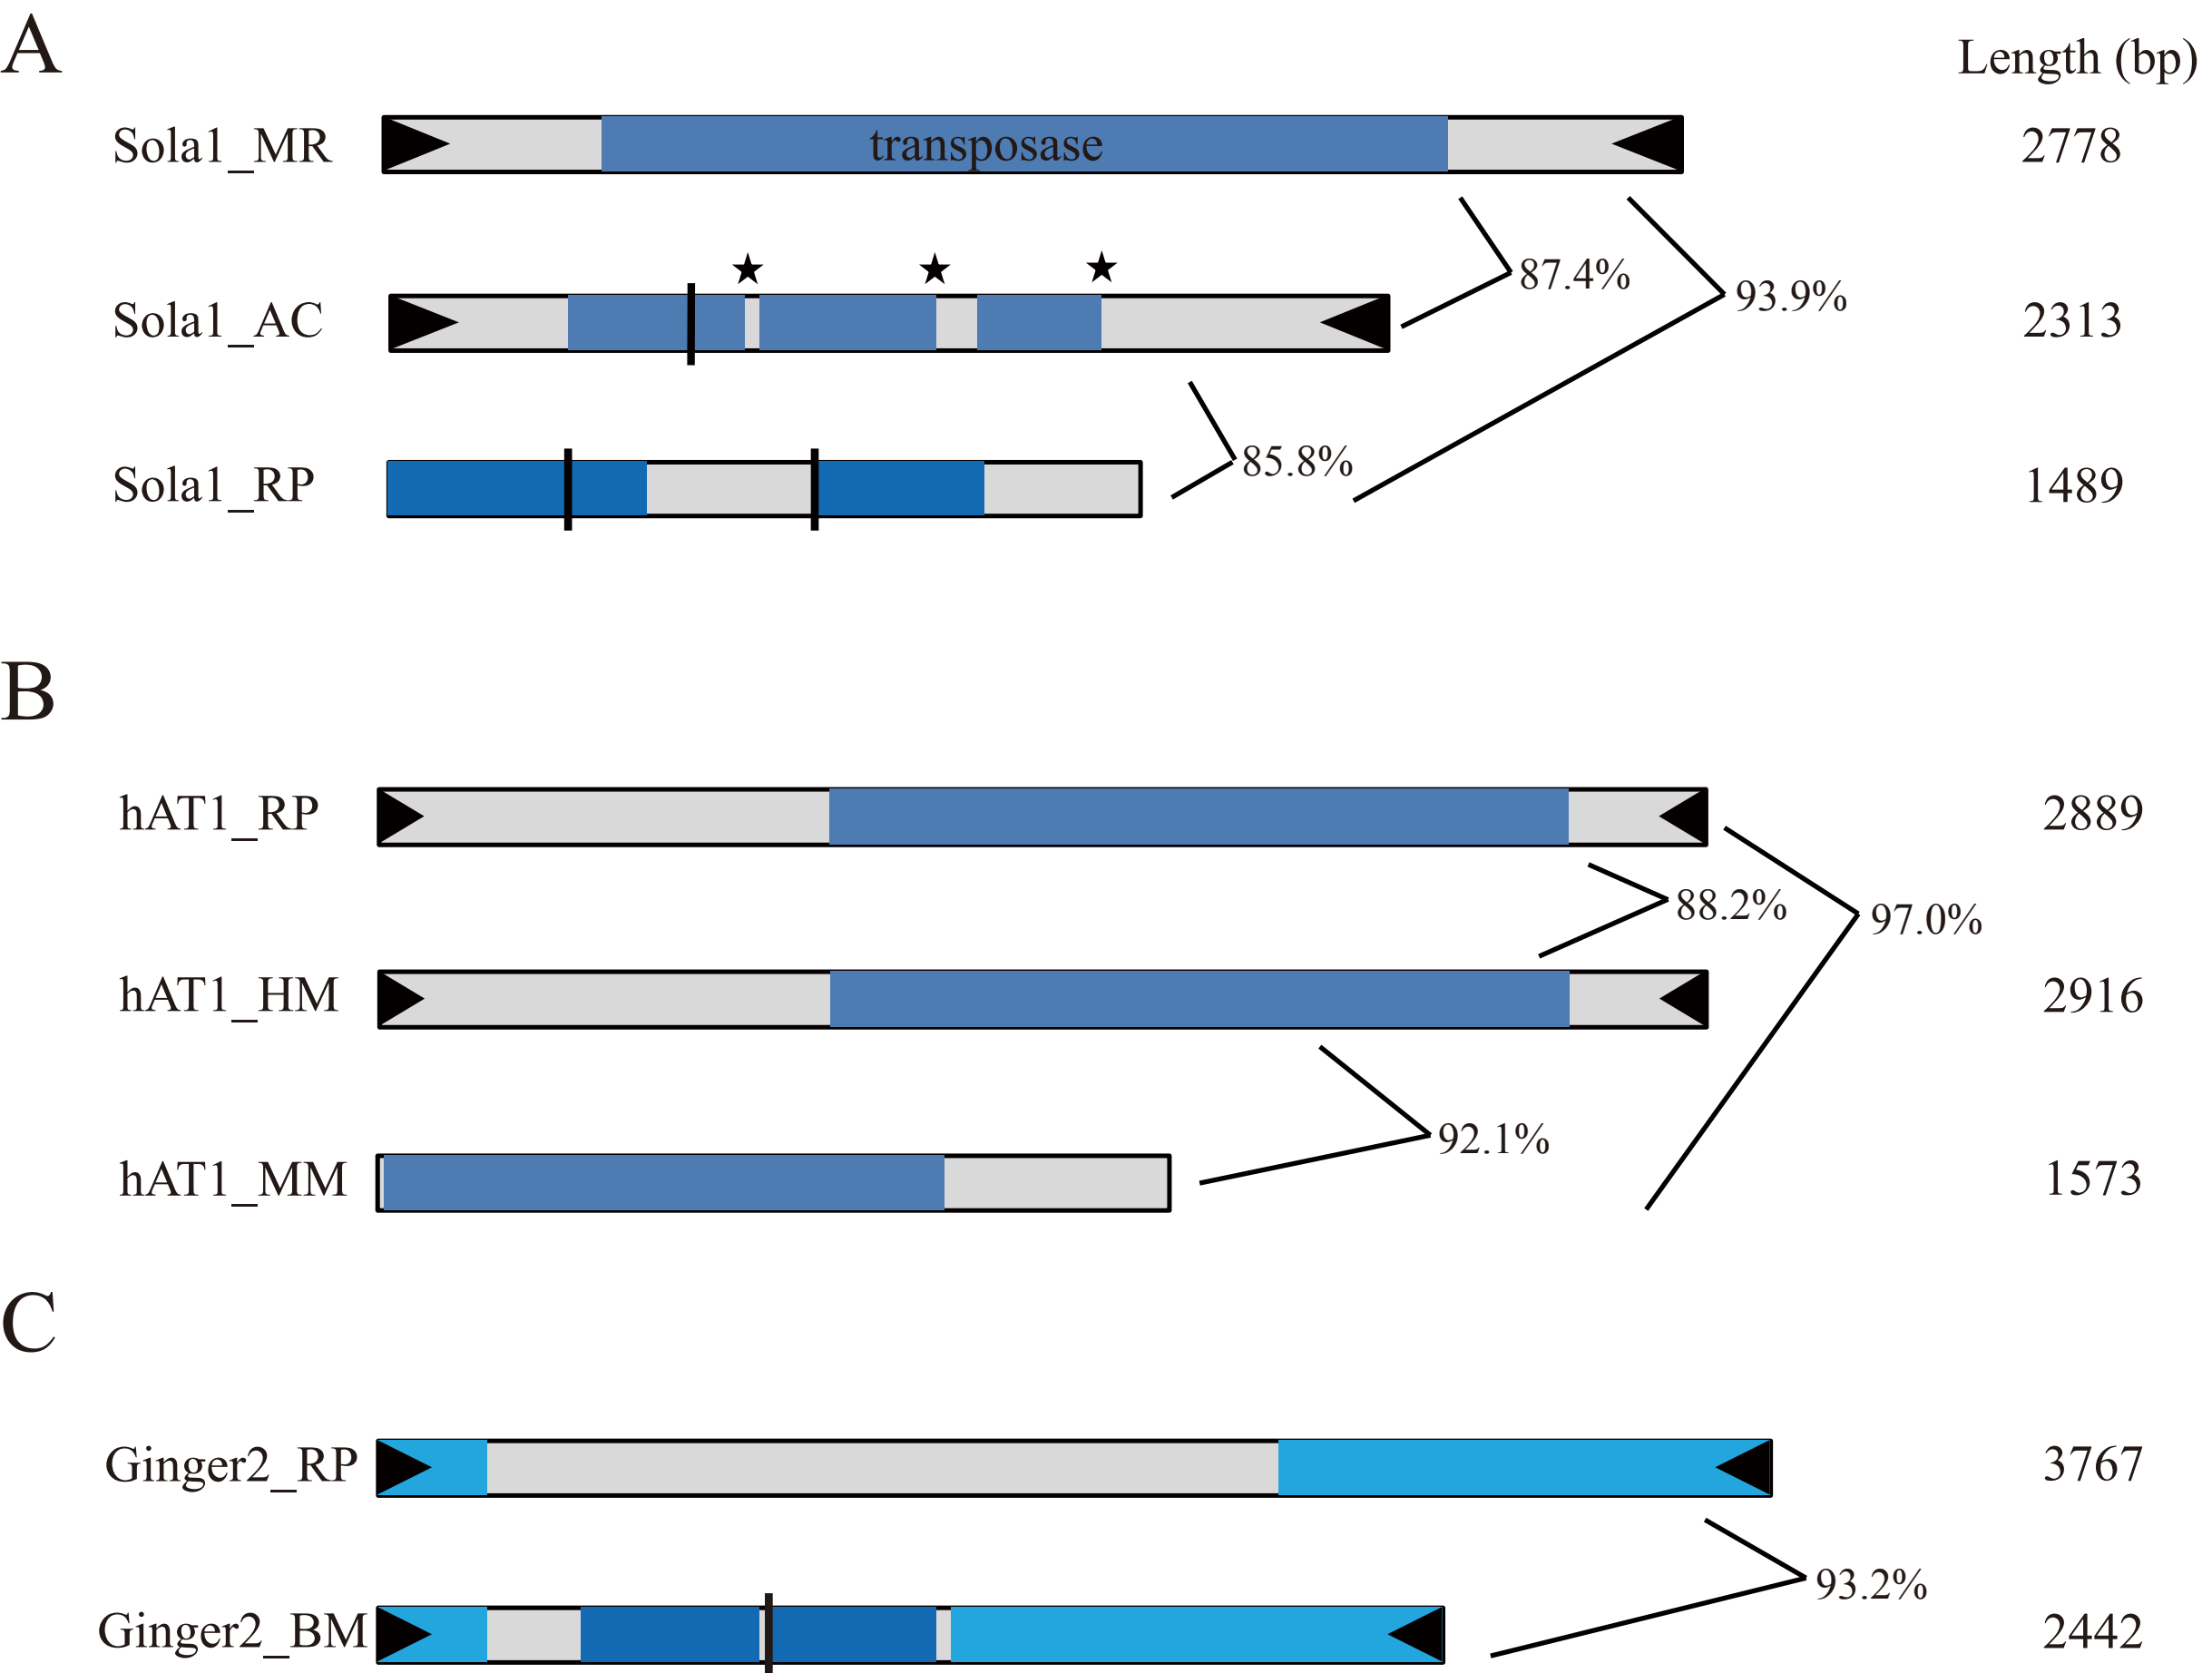

Fig. S4 Diagram showing the detail information about the autonomous elements of *Sola1\_NA* (A), *hAT1\_NA* (B) and *Ginger2\_NA* (C). Black triangles represent the TIRs. Gray rectangles represent non-coding regions, and blue rectangles indicate transposase regions. Stop codons were shown using stars, and frameshifts were indicated using the black lines. Percentages of identity were calculated using Bioedit. Length of their representatives or consensus sequences in each host was also shown on the right. The bright green rectangles represent the homology regions between *Ginger2\_BM* and *Ginger2\_RP*.
