# Supplementary material for: The Origin and Evolution of Six Miniature Inverted-Repeat Transposable Elements in Bombyx mori and Rhodnius prolixus
Source: PubMed Central journal article supplement — Genome Biol Evol. 2013 Oct 9;5(11):2020–31. doi: 10.1093/gbe/evt153 (PMC3845634; doi:10.1093/gbe/evt153), 2013-10-09
Supplement: supp_evt153_FigureS5.pdf [file supp_evt153_FigureS5.pdf]

A

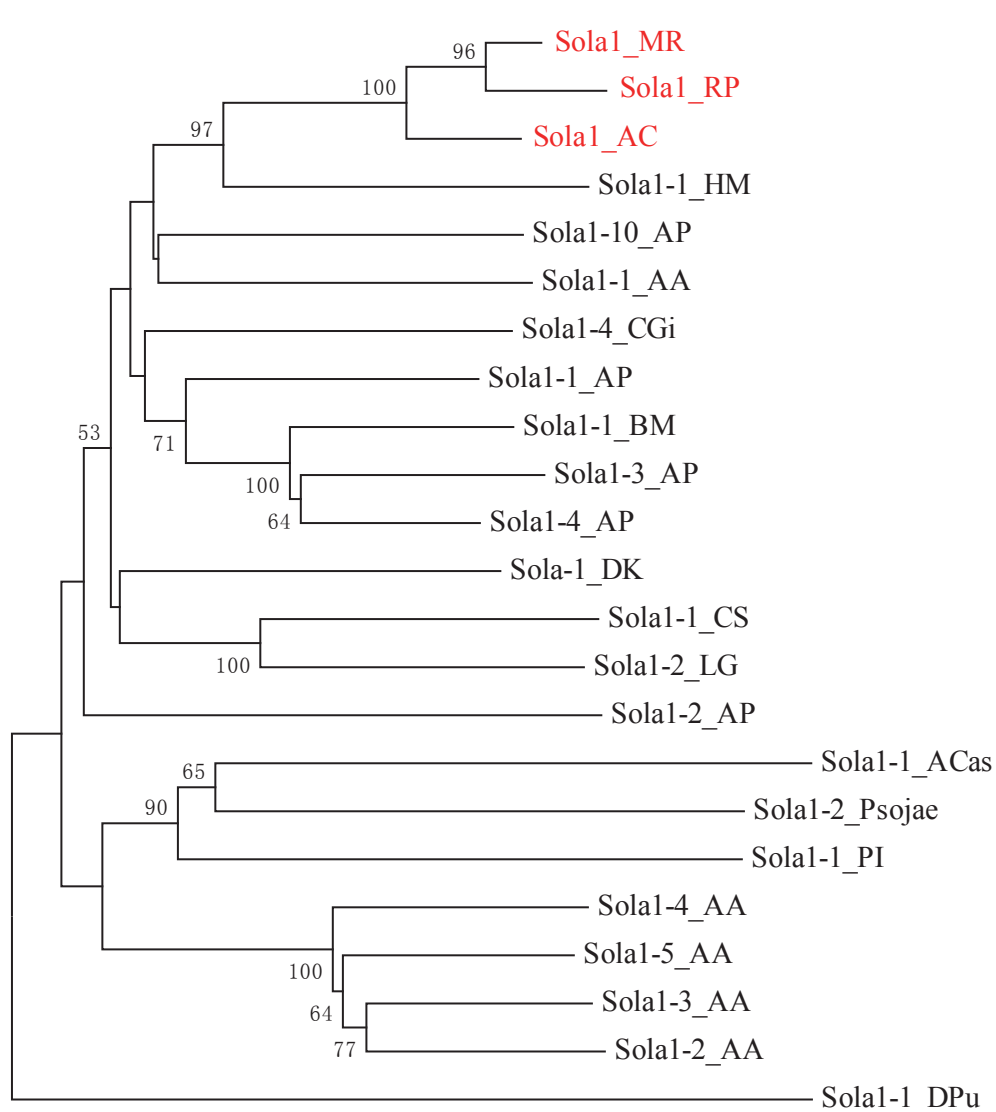

B

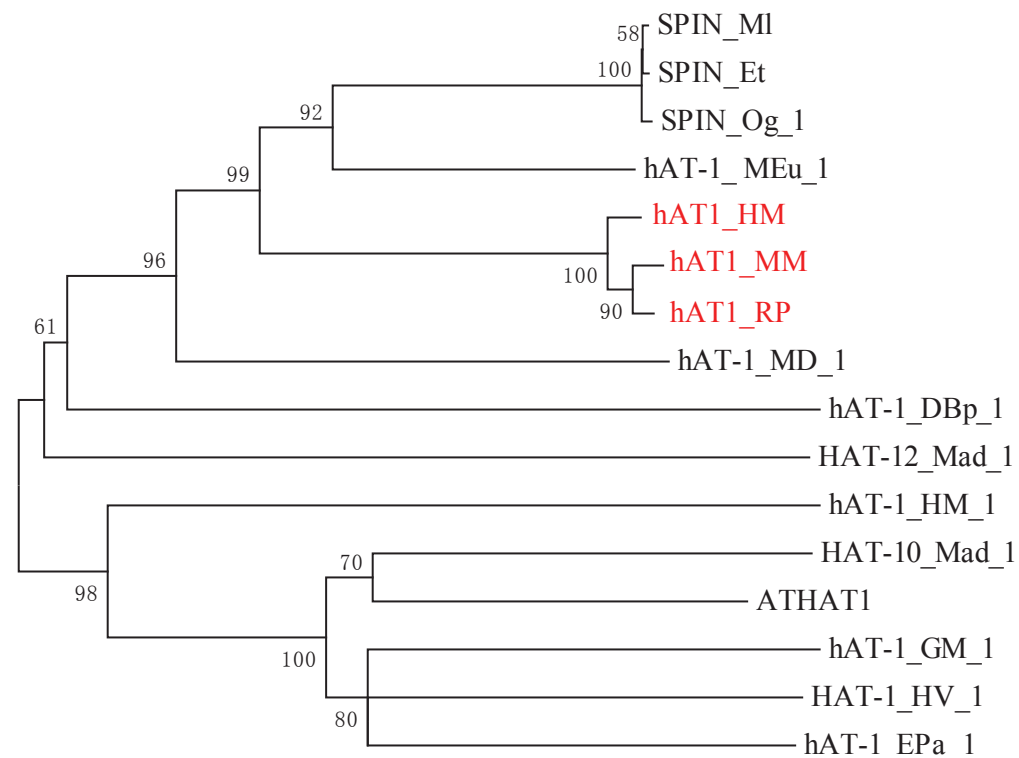

C

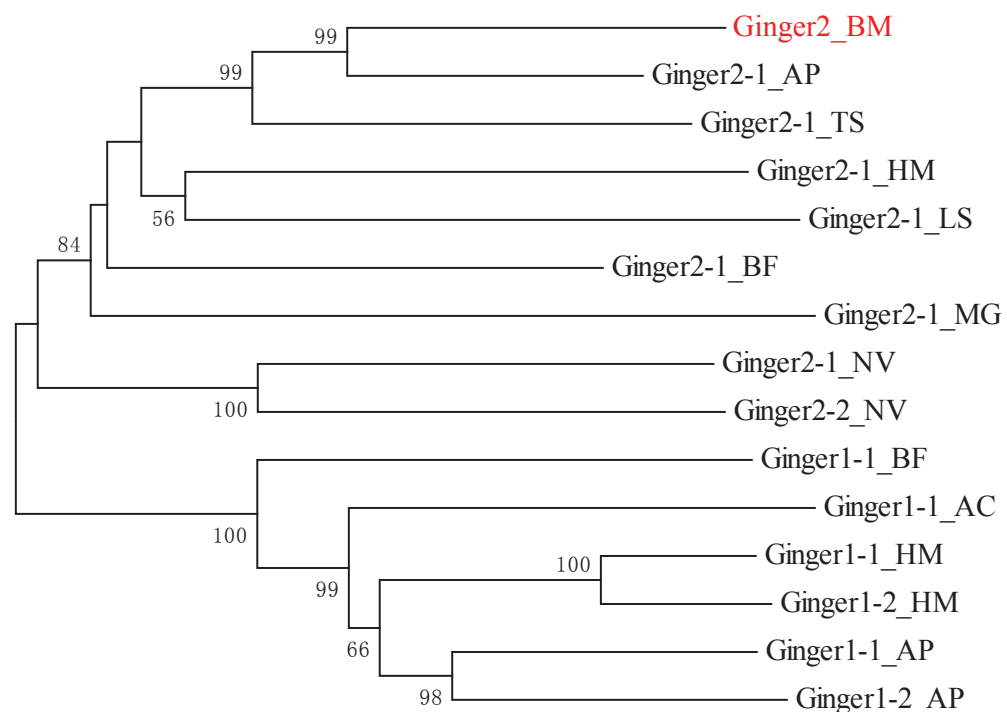

Fig.S5 Phylogenies of *Sola1* (A), *hAT1* (B) and *Ginger2* (C). Those transposons identified in this study are shown in red color. Phylogenetic trees were reconstructed using MEGA4. Bootstrap values higher than 50% are reported at the corresponding nodes. Species abbreviations are as follows: BM, *Bombyx mori*; AC, *Atta cephalotes*; MR, *Megachile rotundata*; CS, *Ciona savignyi*; DPu, *Daphnia pulex*; HM, *Hydra magnipapillata*; PI, *Phytophthora infestans*; AA, *Aedes aegypti*; AP, *Acyrtosiphon pisum*; LG, *Lottia gigantea*; Psojae, *Phytophthora sojae*; CGi, *Crassostrea gigas*; DK, *Drosophila kikkawai*; ACas, *Acanthamoeba castellanii*; AT, *Arabidopsis thaliana*; ET, *Echinops telfairi*; MI, *Myotis lucifugus*; Og, *Otolemur garnettii*; Mad, *Malus x domestica*; DBp, *Drosophila bipectinata*; HV, *Hordeum vulgare*; EPa, *Eutrema parvulum*; GM, *Glycine max*; MD, *Monodelphis domestica*; MEu, *Macropus eugenii*; RP, *Rhodnius prolixus*; BF, *Branchiostoma floridae*; LS, *Littorina saxatilis*; MG, *Malassezia globosa*; NV, *Nematostella vectensis*; TS, *Trichinella spiralis*; MM, *Mengenilla moldrzyki*. *Ginger2\_RP* was not included in the phylogenetic analysis since we could not determine its coding sequences.
